# Supplementary material for: Structural kinetics of a Pt/C cathode catalyst with practical catalyst loading in an MEA for PEFC operating conditions studied by in situ time-resolved XAFS
Source: Royal Society of Chemistry journal article supplement (doi:10.1039/c3cp52578c), 2013-01-01
Supplement: c3cp52578c.pdf [file c3cp52578c.pdf]

## Electronic Supplementary Information

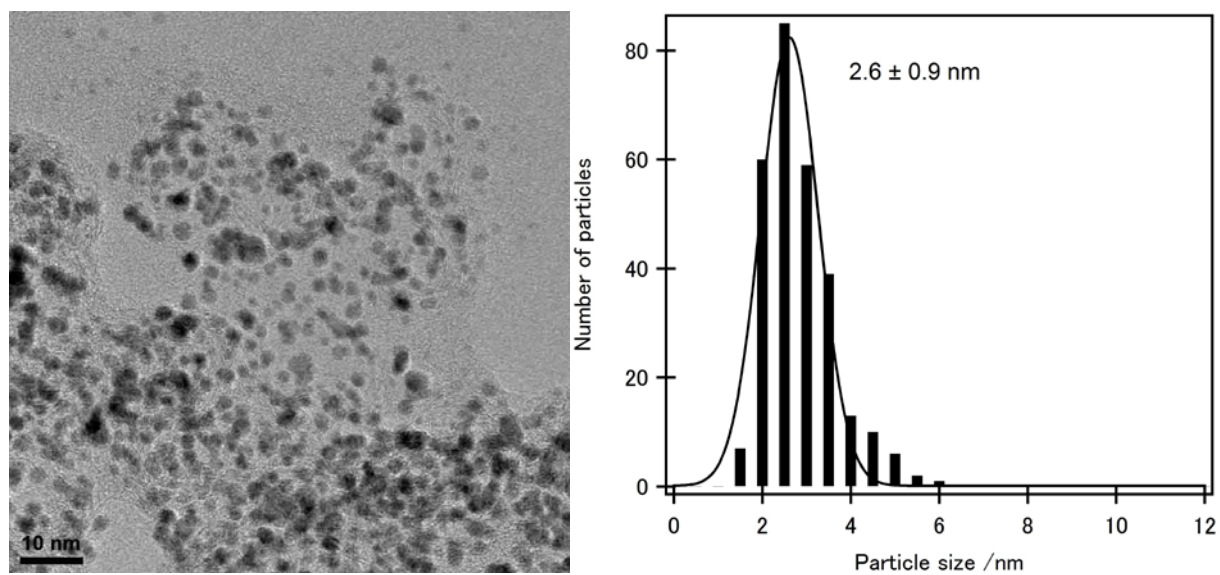

**Figure S1.** The TEM image of the Pt/C cathode catalyst in a fresh MEA ( $0.5 \text{ mg}_{\text{Pt}}/\text{cm}^2$ ) and its particle size distribution estimated by the TEM image.

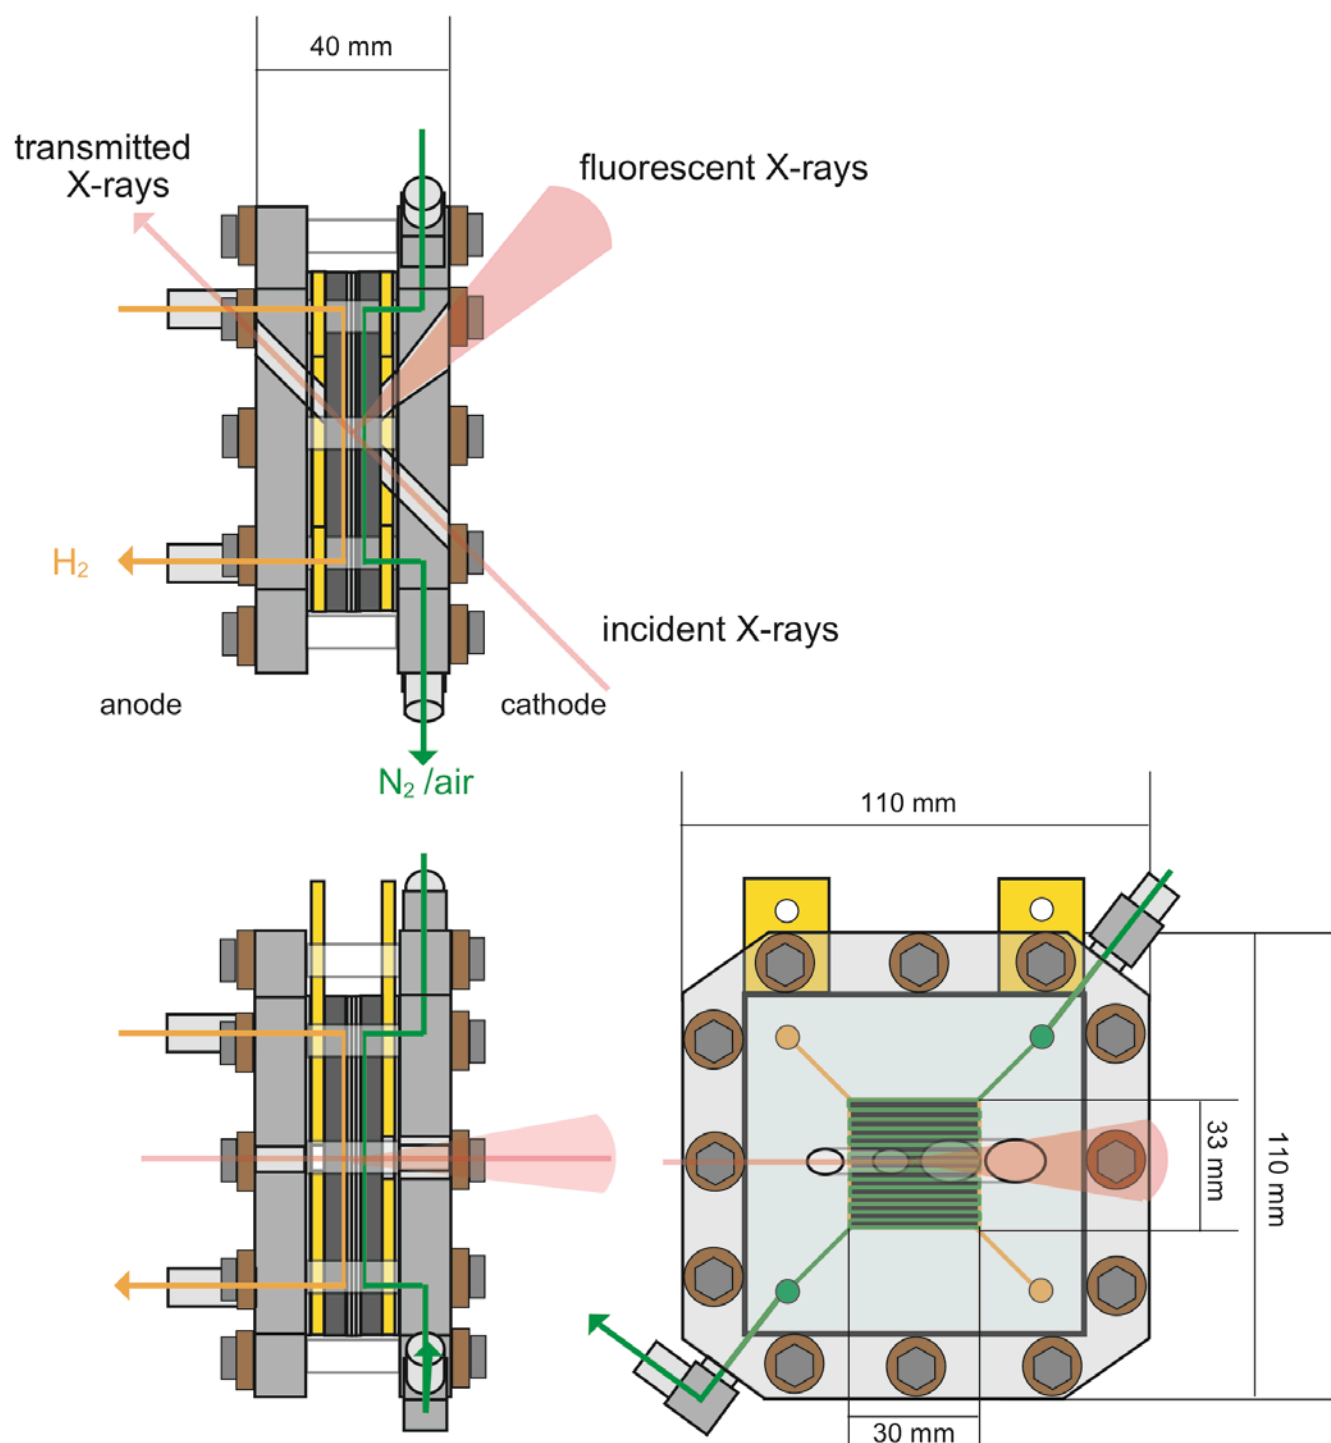

**Figure S2.** Schematics of an in situ XAFS cell for PEFCs: overhead view (top), side view (bottom left), and front view (bottom right).

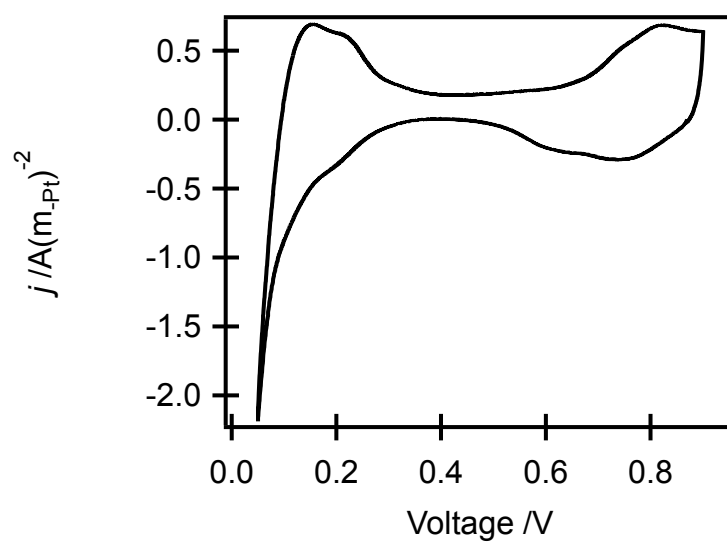

**Figure S3.** Cyclic voltammogram of the Pt/C electrocatalyst recorded before the in situ time-resolved QXAFS measurements at SPring-8 BL40XU. The voltage was swept between 0.05 and 0.9 V at  $50 \text{ mV s}^{-1}$  under  $\text{H}_2$  flow (anode) and  $\text{N}_2$  flow (cathode).

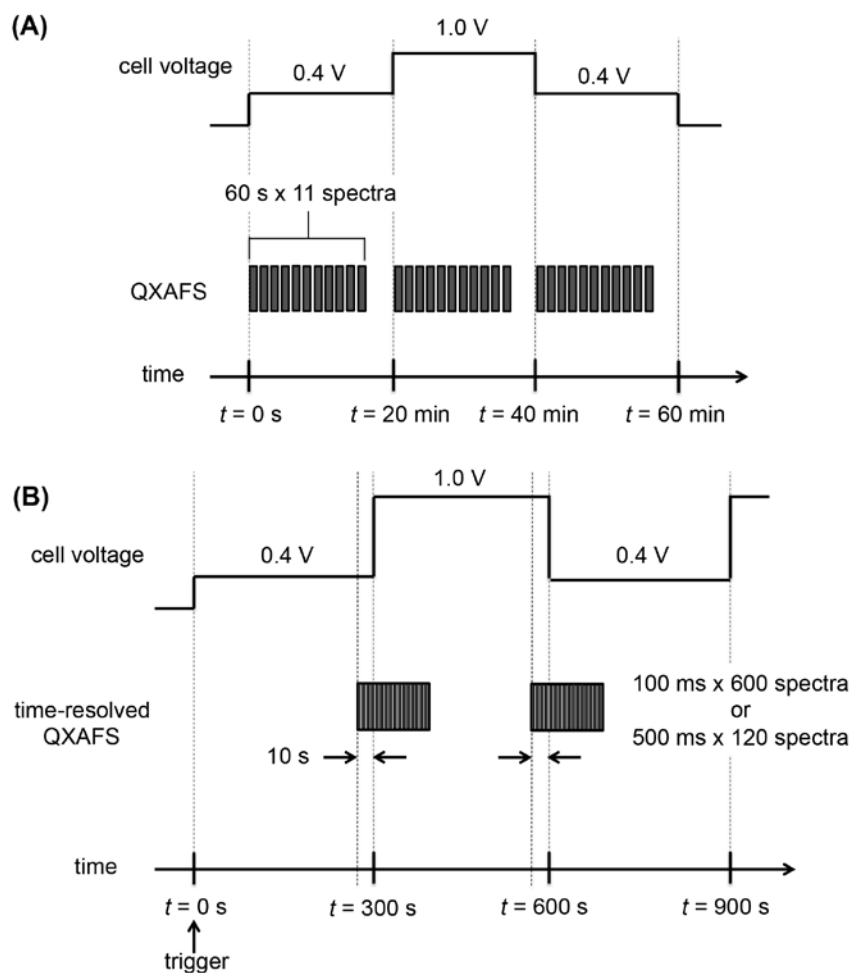

**Figure S4.** Schematics of (A) the in situ QXAFS measurements (60 s) at SPring-8 BL01B1 and (B) the in situ time-resolved QXAFS (100 or 500 ms) measurements at SPring-8 BL40XU.

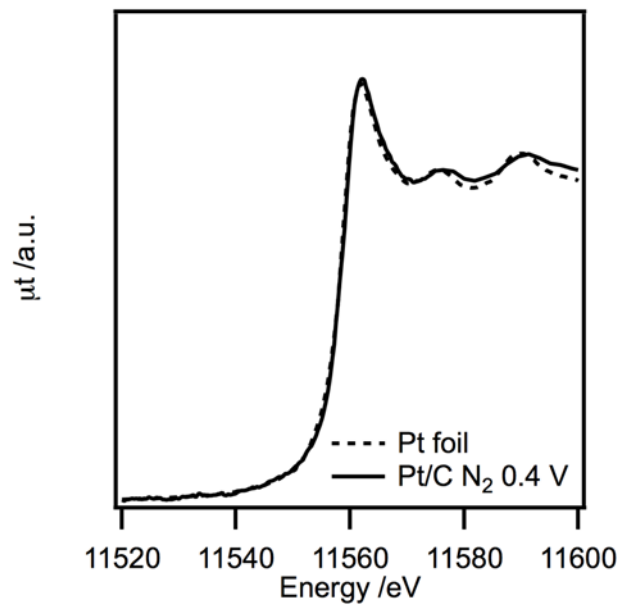

**Figure S5.** Pt  $L_{III}$ -edge XANES spectra of Pt foil (Pt(0)) and Pt/C at 0.4 V ( $N_2$  flow).

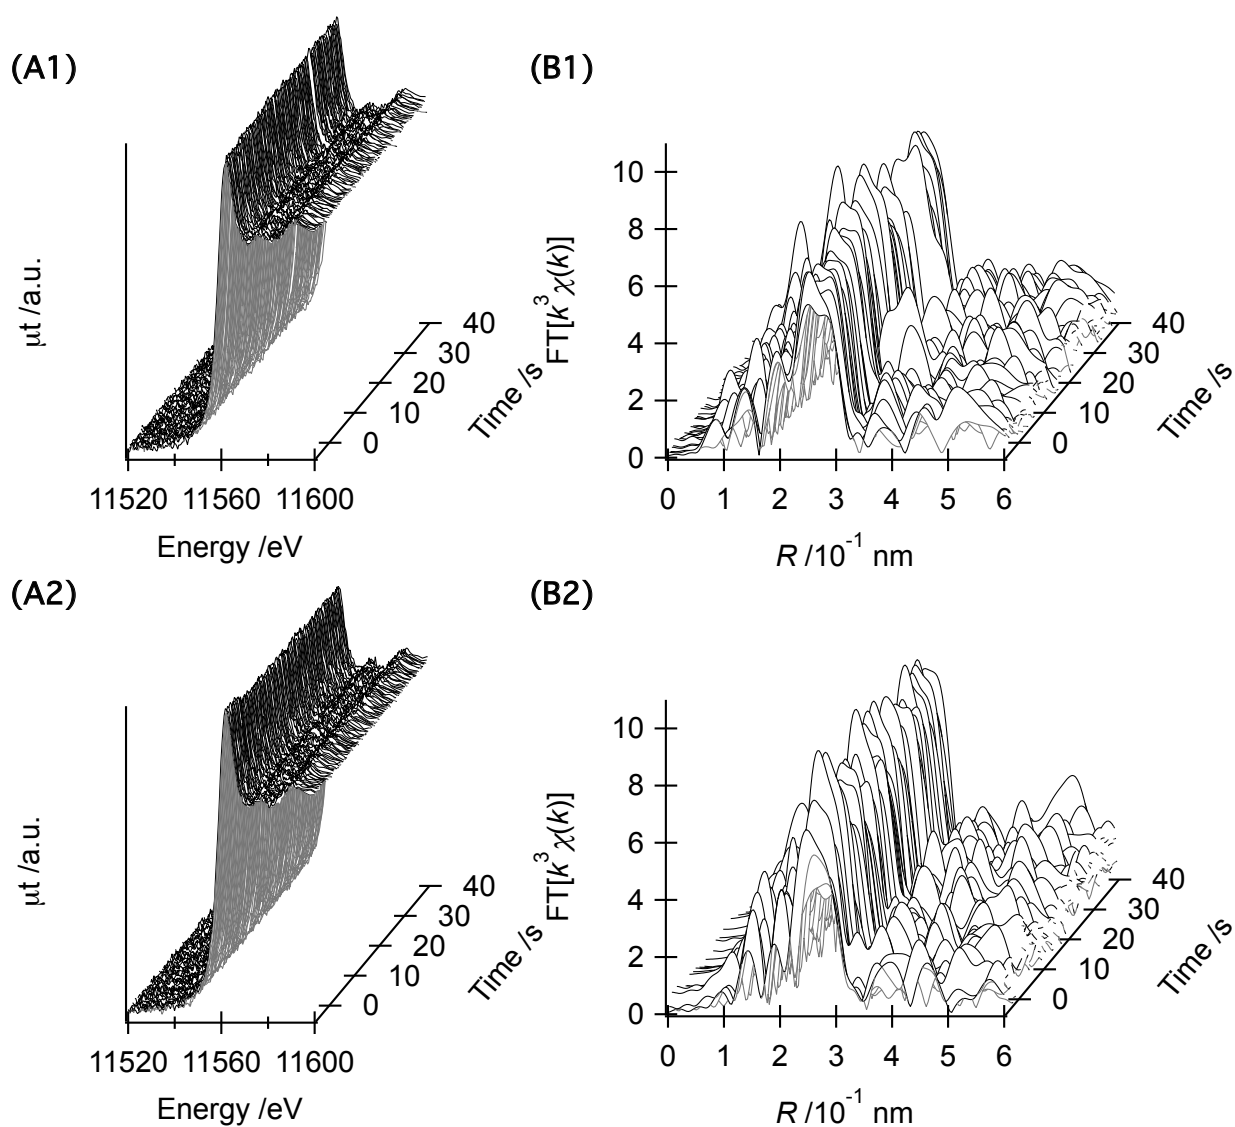

**Figure S6.** A series of in situ time-resolved Pt  $L_{III}$ -edge XAFS spectra for Pt/C MEA under air flow at the cathode. (A) A series of in situ time-resolved Pt  $L_{III}$ -edge XANES spectra, recorded at 100 ms intervals. (B) A series of  $k^3$ -weighted EXAFS Fourier transforms at  $k = 30\text{--}120 \text{ nm}^{-1}$ , recorded at 500 ms intervals. Spectra for the voltage steps of (1)  $0.4 \text{ V} \rightarrow 1.0 \text{ V}$  and (2)  $1.0 \text{ V} \rightarrow 0.4 \text{ V}$ .

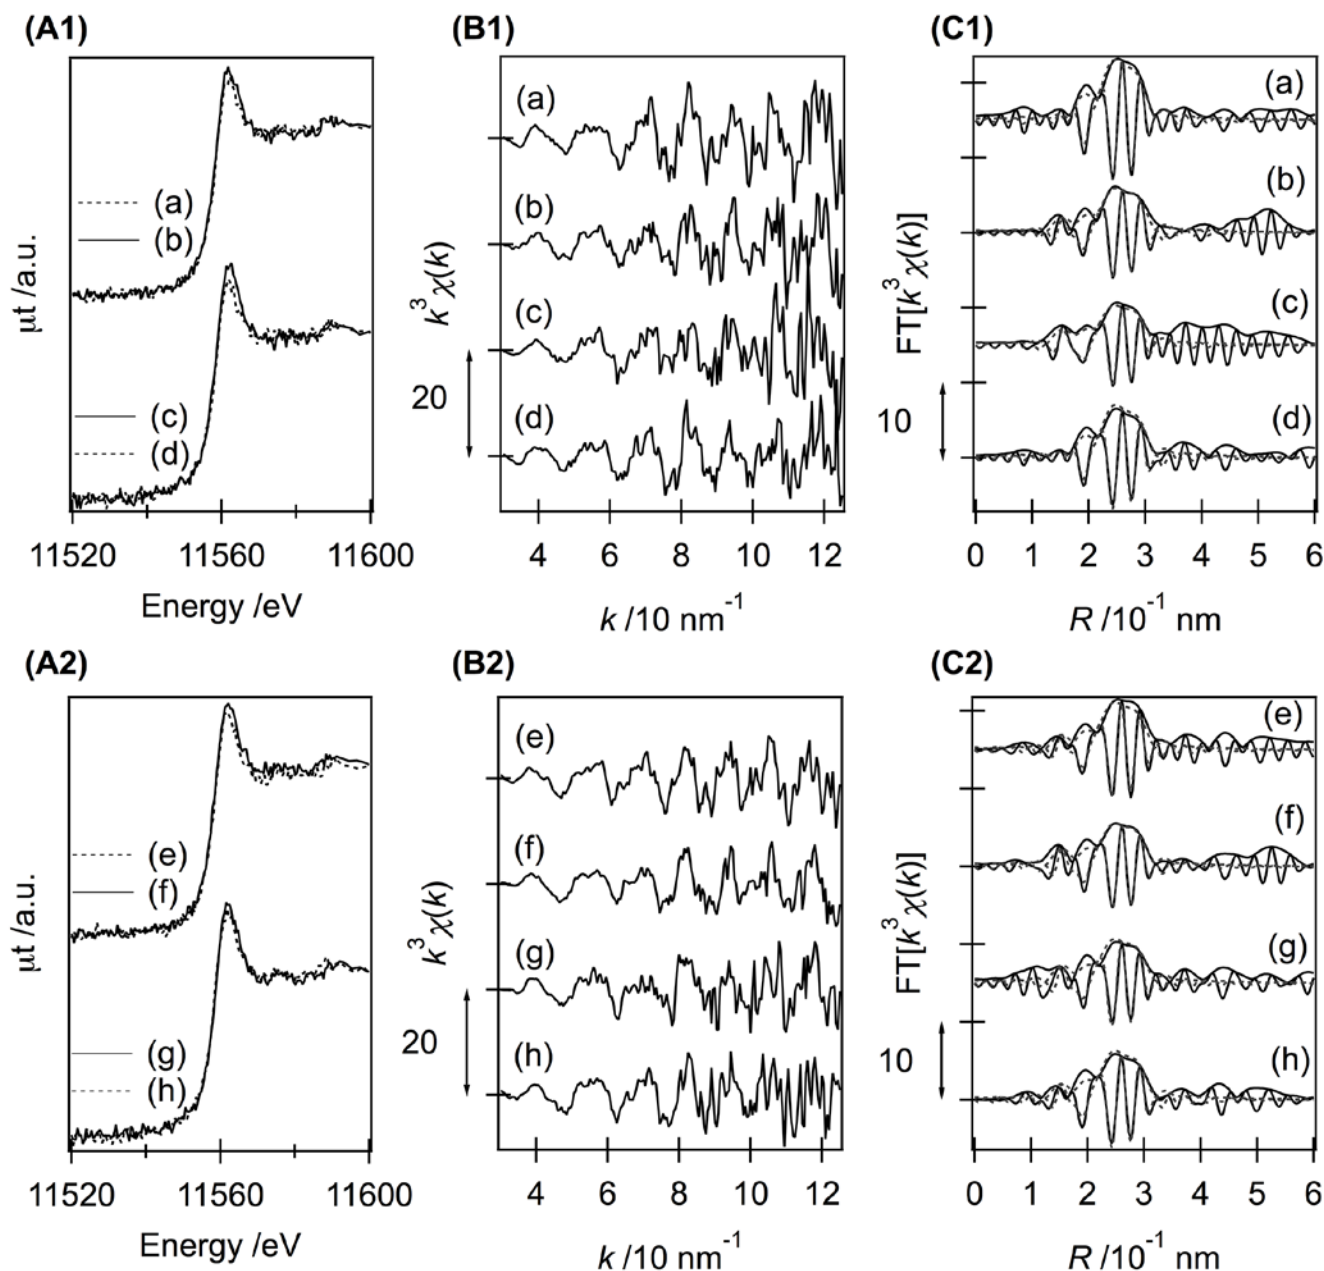

**Figure S7.** In situ time-resolved XAFS spectra at 0.4 and 1.0 V for the Pt/C MEA. (A) Pt  $L_{III}$ -edge XANES spectra, recorded every 100 ms, (B)  $k^3$ -weighted Pt  $L_{III}$ -edge EXAFS oscillations, recorded every 500 ms, and (C) their  $k^3$ -weighted EXAFS Fourier transforms at  $k = 30\text{--}120\text{ nm}^{-1}$ . Solid line: experimental data; solid line: fitted data. (1) Cathode:  $\text{N}_2$  flow, (2) cathode: air flow. (a)  $t = 296.5\text{ s}$  (0.4 V in  $\text{N}_2$ ), (b)  $335.0\text{ s}$  (1.0 V in  $\text{N}_2$ ), (c)  $t = 597.5\text{ s}$  (1.0 V in  $\text{N}_2$ ), and (d)  $t = 644.5\text{ s}$  in  $\text{N}_2$  (0.4 V in  $\text{N}_2$ ), (e)  $t = 298.0\text{ s}$  (0.4 V in air), (f)  $344.0\text{ s}$  (1.0 V in air), (g)  $t = 592.0\text{ s}$  (1.0 V in air), and (h)  $t = 643.0\text{ s}$  (0.4 V in air).

**Table S1. Structural parameters estimated by curve fitting analysis of the Fourier transforms of the in situ time-resolved Pt *L*<sub>III</sub>-edge EXAFS at 0.4 and 1.0 V for the Pt/C MEA (see Figure S7)**

| Sample                                                                                    | Shell | CN         | <i>R</i> /nm  | $\Delta E_0$ /eV | $\sigma^2$ /10 <sup>-5</sup> nm <sup>2</sup> |
|-------------------------------------------------------------------------------------------|-------|------------|---------------|------------------|----------------------------------------------|
| <b>(a) <i>t</i> = 296.5 s in N<sub>2</sub> (0.4 V)</b><br>( <i>R</i> <sub>f</sub> = 1.7%) | Pt-O  | -0.1 ± 0.1 | 0.199         | 2                | 0.1                                          |
|                                                                                           | Pt-Pt | 10.3 ± 0.5 | 0.273 ± 0.001 | 1 ± 1            | 7.7                                          |
| <b>(b) <i>t</i> = 335.0 s in N<sub>2</sub> (1.0 V)</b><br>( <i>R</i> <sub>f</sub> = 3.1%) | Pt-O  | 0.5 ± 0.1  | 0.199         | 2                | 0.1                                          |
|                                                                                           | Pt-Pt | 7.8 ± 0.5  | 0.274 ± 0.001 | 2 ± 1            | 7.7                                          |
| <b>(c) <i>t</i> = 597.5 s in N<sub>2</sub> (1.0 V)</b><br>( <i>R</i> <sub>f</sub> = 4.1%) | Pt-O  | 0.6 ± 0.1  | 0.199         | 2                | 0.1                                          |
|                                                                                           | Pt-Pt | 7.1 ± 0.6  | 0.273 ± 0.001 | 1 ± 1            | 7.7                                          |
| <b>(d) <i>t</i> = 644.5 s in N<sub>2</sub> (0.4 V)</b><br>( <i>R</i> <sub>f</sub> = 2.5%) | Pt-O  | -0.0 ± 0.1 | 0.199         | 2                | 0.1                                          |
|                                                                                           | Pt-Pt | 9.0 ± 0.5  | 0.274 ± 0.001 | 2 ± 1            | 7.7                                          |
| <b>(e) <i>t</i> = 298.0 s in air (0.4 V)</b><br>( <i>R</i> <sub>f</sub> = 2.9%)           | Pt-O  | 0.5 ± 0.1  | 0.199         | 2                | 0.1                                          |
|                                                                                           | Pt-Pt | 8.1 ± 0.5  | 0.274 ± 0.001 | 2 ± 1            | 7.7                                          |
| <b>(f) <i>t</i> = 344.0 s in air (1.0 V)</b><br>( <i>R</i> <sub>f</sub> = 4.7%)           | Pt-O  | 0.6 ± 0.2  | 0.199         | 2                | 0.1                                          |
|                                                                                           | Pt-Pt | 7.4 ± 0.6  | 0.275 ± 0.001 | 1 ± 1            | 7.7                                          |
| <b>(g) <i>t</i> = 592.0 s in air (1.0 V)</b><br>( <i>R</i> <sub>f</sub> = 5.7%)           | Pt-O  | 0.6 ± 0.2  | 0.199         | 2                | 0.1                                          |
|                                                                                           | Pt-Pt | 7.3 ± 0.7  | 0.274 ± 0.001 | 2 ± 1            | 7.7                                          |
| <b>(h) <i>t</i> = 643.0 s in air (0.4 V)</b><br>( <i>R</i> <sub>f</sub> = 3.5%)           | Pt-O  | 0.5 ± 0.1  | 0.199         | 2                | 0.1                                          |
|                                                                                           | Pt-Pt | 8.4 ± 0.6  | 0.274 ± 0.001 | 3 ± 1            | 7.7                                          |

*S*<sub>0</sub><sup>2</sup> = 0.94, *k* = 30–120 nm<sup>-1</sup>, *R* = 0.12–0.35 nm. *R*,  $\Delta E_0$ , and  $\sigma^2$  of Pt-O and  $\sigma^2$  of Pt-Pt were fixed at the values for Pt/C at 1.0 V under N<sub>2</sub> flow in Table 1.
